# Supplementary material
Source: PubMed Central journal article supplement (PMC4207359)
Supplement: NIHMS624461-supplement-01.pdf [file NIHMS624461-supplement-01.pdf]

### **Generation of the SM22 $\alpha$ -Cre knock-in (SM22 $\alpha$ -CreKI) mouse**

SM22 $\alpha$ -CreKI mice were generated by knocking-in the Cre-recombinase coding sequence into the endogenous SM22 $\alpha$  gene locus via homologous recombination in ES cells. The targeting vector was generated in the pKO plasmid, which contains the PGK-neo-poly(A) and pol2-DTA-poly(A) cassettes for positive and negative selection, respectively. The targeting vector contains a genomic fragment that includes 3 kb of the SM22 $\alpha$  5'-flanking sequence and the exon 1 sequence through the initiation codon. The Cre-recombinase coding sequence was inserted in-frame at the SM22 $\alpha$  initiation site, which allows the Cre-recombinase driven by the endogenous SM22 $\alpha$  promoter. The targeting vector also includes the 2.8 kb SM22 $\alpha$  genomic fragment that spans exon 1 through intron 1 sequence for homologous recombination. The targeting vector linearized by *Sal I* was transfected into 129S6SvEv/Tac embryonic stem cells through electroporation. G418-resistant colonies were analyzed for homologous recombination by Southern blot analysis after *EcoR I* digestion with a 5' genomic probe that contained sequences that reside outside the targeting vector. Two targeted clones were injected into C57BL/6 blastocysts to produce chimeras, which were crossed with C57BL/6 female mice to generate heterozygous SM22 $\alpha$ -CreKI mice. The chimera mice produced from both targeted ES clones show germline transmission. We analyzed two independent SM22 $\alpha$ -CreKI mice lines: both of them show similar expression patterns in embryonic stages and in adult. The heterozygous mice were inbred for getting homozygous mice and further characterization. Genotyping was performed using a combination of three-primers as shown in Figure S1a-S1c: GGCCCAGGGGTTGTCAAATAGTC (common forward primer, 5' to the SM22 $\alpha$  initiation site); CTCCTCCAGCTCCTCGTCATACTTC (wild

type-specific); and CGCCGCATAACCAGTGAAACAG (knock-in specific). Reaction products of 480 bp, 758 bp or both, represent the wild type, homozygous SM22 $\alpha$ -CreKI or heterozygous SM22 $\alpha$ -CreKI mice, respectively. As the first step to characterize SM22 $\alpha$ -CreKI mice, we showed that Cre was expressed in SMC-rich tissues such as aorta in both heterozygous and homozygous SM22 $\alpha$ -CreKI mice, but not in wild type mice (Fig. S1d).

### FIGURE LEGENDS

**Figure S1. Generation of the SM22 $\alpha$ -CreKI mouse by in frame targeted integration of**

**Cre-recombinase into mouse SM22 $\alpha$  locus. *a*:** Strategies used to direct Cre expression to smooth muscle cells. The structures of the wild-type SM22 $\alpha$  locus, targeting construct, and targeted SM22 $\alpha$  locus are shown. The filled boxes denote the first exon of the SM22 $\alpha$  gene.

The open boxes represent the Cre coding sequence followed by a BGH polyadenylation signal, a neomycin-resistance gene expression cassette (PGK-neo), and a DTA cassette for negative selection. Also shown is the locations of the probes used to detect a 12.7 kb and a 5.5 or 10.3 kb *EcoR* I (R) fragment of the wild-type and targeted SM22 $\alpha$  locus, respectively.

***b*:** Southern blot analyses of *EcoRI*-digested genomic DNA from ES cell clones demonstrates that clone 3 and 4 carry the targeted allele. Both of them were used for generating chimeras.

***c*:** Genomic PCR shows the genotype the SM22 $\alpha$ -CreKI mice. Genotyping primers PF and PW generated a 480 bp wild type band. Primers PF and PC generated a 758 bp knock-in band.

***d*:** RT-PCR results indicated that Cre was expressed in aorta of heterozygous and homozygous SM22 $\alpha$ -CreKI mice at 8 weeks. Wt: wild type; Ht: heterozygote; Ho:

homozygote.

**Figure S2. Characterization of SM22a-CreKI mice.** X-Gal-stained sections were prepared from eight-week-old SM22a-CreKI and *Gt(Rosa)26Sor* double heterozygous mice. **A and B:** HE staining of the esophagus. **C and D:** X-Gal positive staining in smooth muscle cells of esophagus. Magnification: 40X (A and C) and 200X (B and D). **E:** X-Gal positive staining in smooth muscle cells of small intestine. Magnification: 200X. **F:** X-Gal positive staining in vessels of the liver. Magnification: 400X.

**Figure S3. The comparison of LacZ expression by X-gal staining.** (A) The *LacZ* gene driven by a SM22 $\alpha$  promoter is highly expressed in the arterial vasculature and the heart at E13 (a positive control for X-gal staining). (B) and (C): The Cre-induced lacZ in a SM22 $\alpha$ -CreKI/*Gt(Rosa)26Sor* embryo at E13.5 (B) or E15 (C) is not detectable in the cardiovascular system.

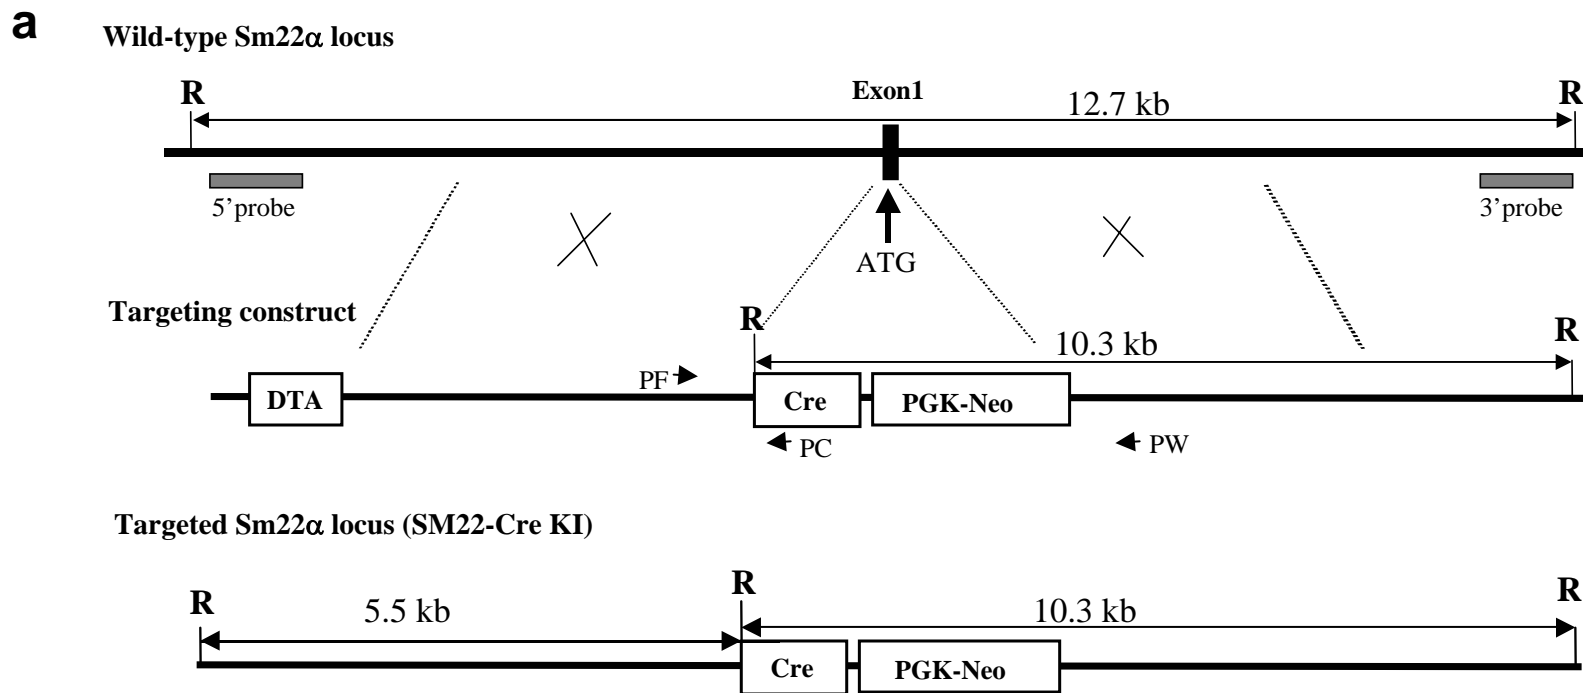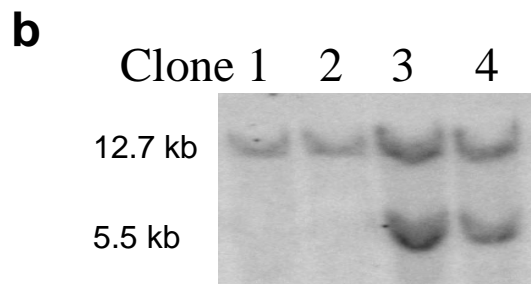

Southern with 5' probe

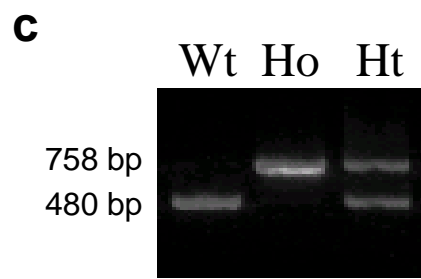

Genotyping

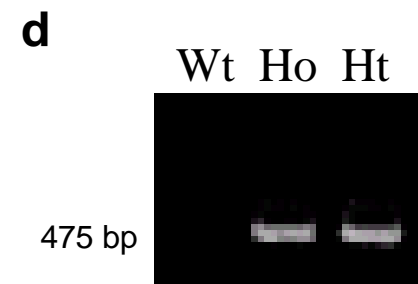

Cre expression

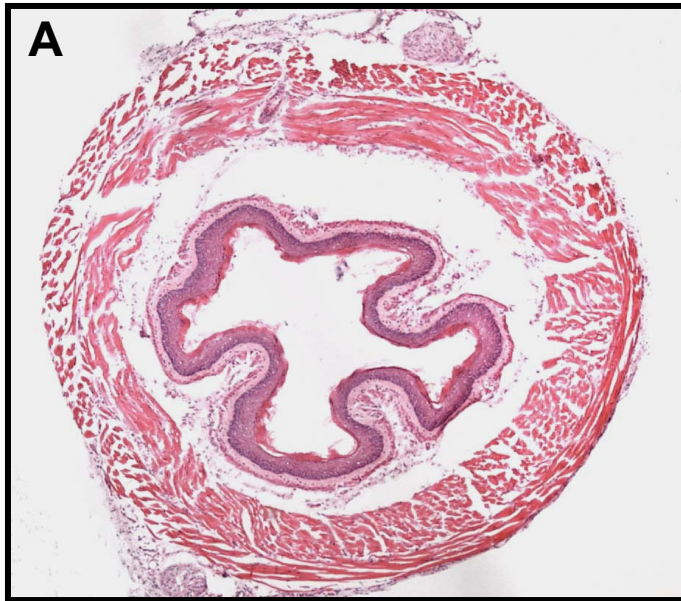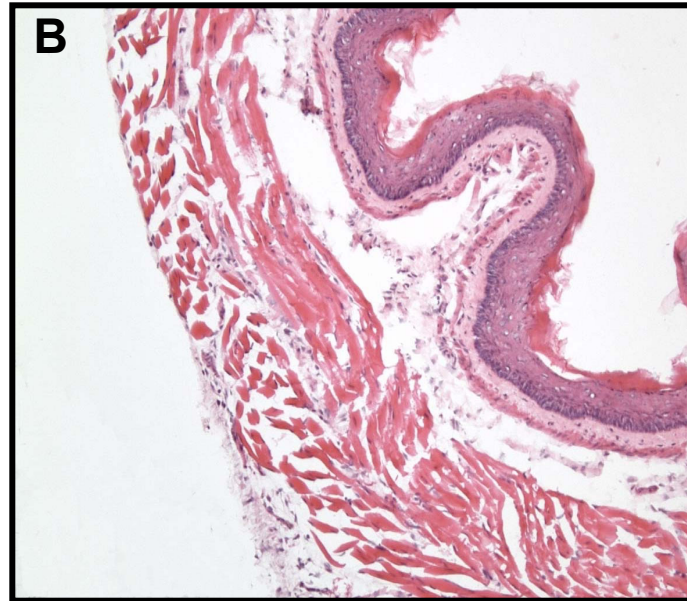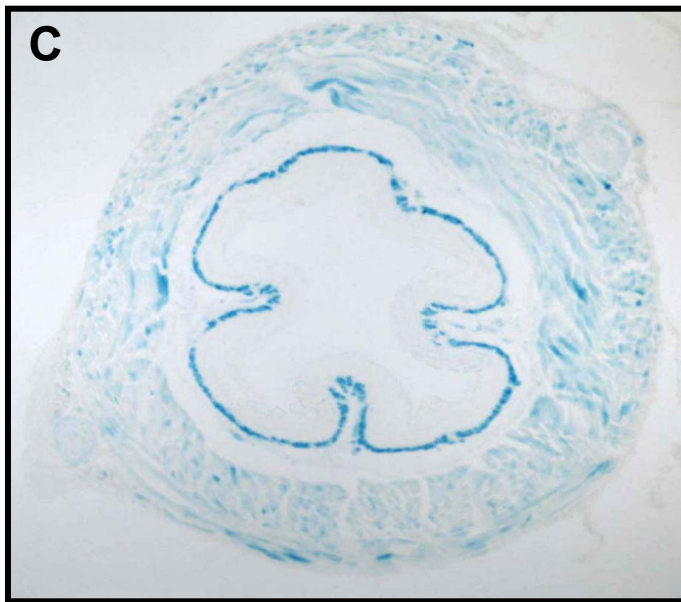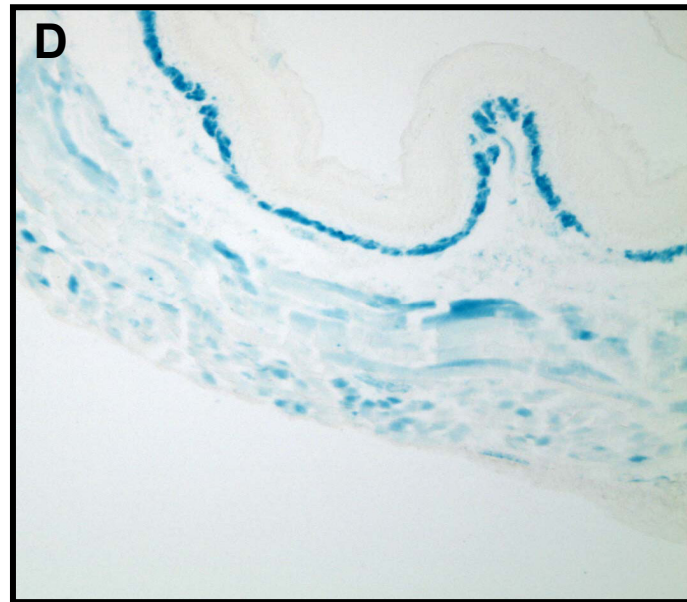

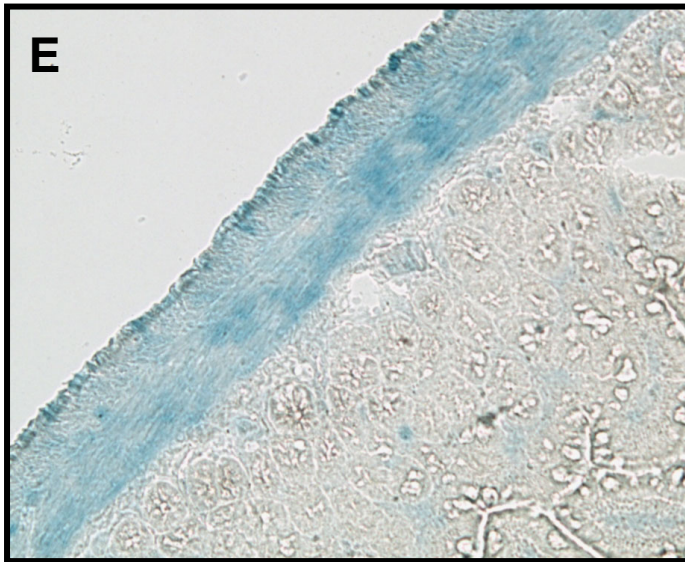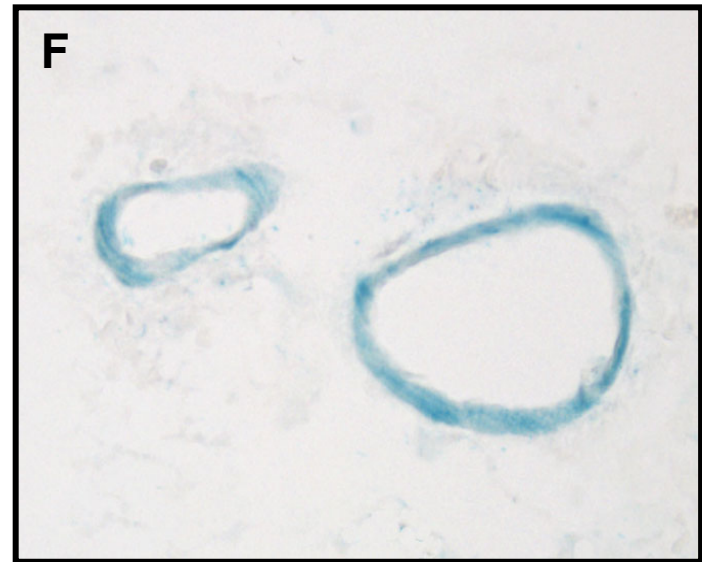

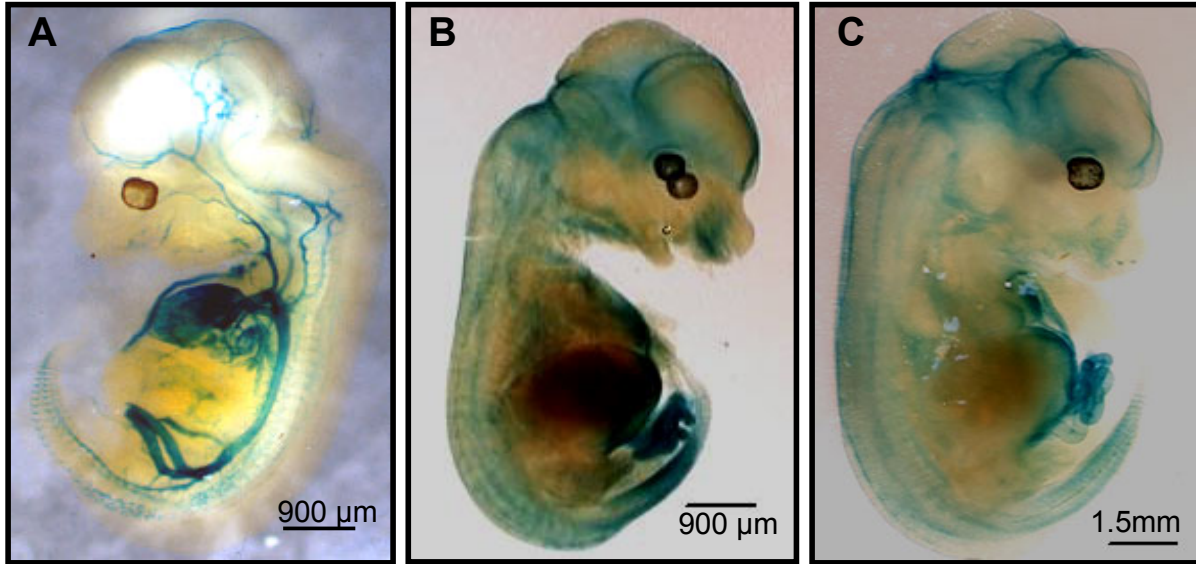

Zhang et al., Fig. S3
